# Supplementary material
Source: Springer Nature journal article supplement (https://www.springermedizin.de/resource/supplementary/12888_2011_930_MOESM4_ESM.pdf/9478556)

Process measure

Outcome measures

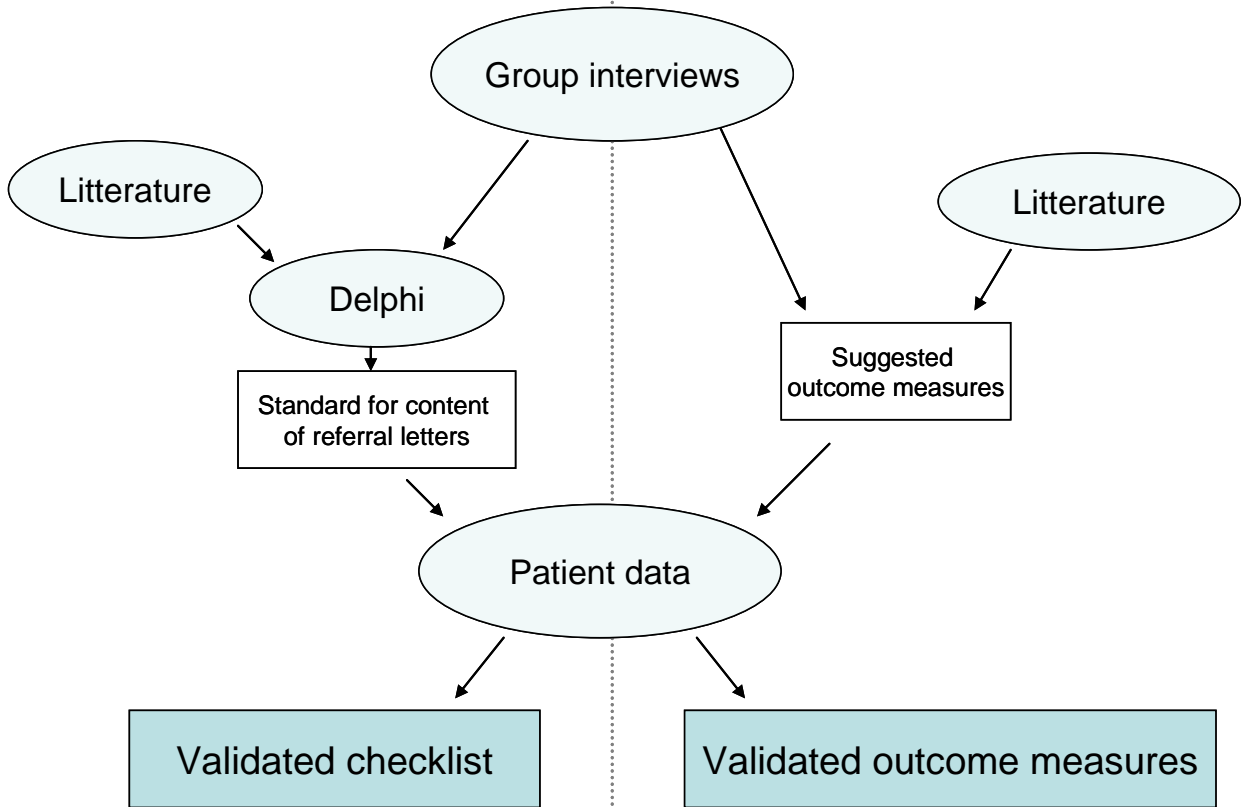

Supplement: MOESM4 [file 9478556]
